# Supplementary material for: A Transcriptional Link between HER2, JAM-A and FOXA1 in Breast Cancer
Source: MDPI journal article supplement (doi:10.3390/cells11040735), 2022-02-19
Supplement: s1 [file s1]

**Supplemental Table S1: Breast cancer datasets included in [www.kmplot.com](http://www.kmplot.com) survival analysis.**

| <b>Dataset name</b> | <b># of patients with available clinical data</b> |
|---------------------|---------------------------------------------------|
| E-MTAB-365          | 537                                               |
| E-TABM-43           | 37                                                |
| GSE11121            | 200                                               |
| GSE12093            | 136                                               |
| GSE12276            | 204                                               |
| GSE1456             | 159                                               |
| GSE16391            | 55                                                |
| GSE16446            | 120                                               |
| GSE16716            | 47                                                |
| GSE17705            | 196                                               |
| GSE17907            | 54                                                |
| GSE18728            | 61                                                |
| GSE19615            | 115                                               |
| GSE20194            | 45                                                |
| GSE20271            | 96                                                |
| GSE2034             | 286                                               |
| GSE20685            | 327                                               |
| GSE20711            | 90                                                |
| GSE21653            | 240                                               |
| GSE22093            | 68                                                |
| GSE25066            | 507                                               |
| GSE2603             | 99                                                |
| GSE26971            | 276                                               |
| GSE29044            | 79                                                |
| GSE2990             | 102                                               |
| GSE31448            | 71                                                |
| GSE31519            | 67                                                |
| GSE32646            | 115                                               |
| GSE3494             | 251                                               |
| GSE36771            | 107                                               |
| GSE37946            | 41                                                |
| GSE41998            | 279                                               |
| GSE42568            | 121                                               |
| GSE43358            | 57                                                |
| GSE43365            | 111                                               |
| GSE45255            | 139                                               |
| GSE4611             | 153                                               |
| GSE46184            | 74                                                |
| GSE48390            | 81                                                |
| GSE50948            | 156                                               |
| GSE5327             | 58                                                |
| GSE58812            | 107                                               |
| GSE61304            | 62                                                |
| GSE65194            | 164                                               |
| GSE6532             | 82                                                |
| GSE69031            | 130                                               |
| GSE7390             | 198                                               |
| GSE76275            | 265                                               |
| GSE78958            | 424                                               |
| GSE9195             | 77                                                |

**Supplemental Table S2: Gastric cancer datasets included in [www.kmplot.com](http://www.kmplot.com) survival analysis.**

| <b>Dataset name</b> | <b># of patients with<br/>available clinical data</b> |
|---------------------|-------------------------------------------------------|
| GSE14210            | 145                                                   |
| GSE15459            | 200                                                   |
| GSE22377            | 43                                                    |
| GSE29272            | 268                                                   |
| GSE51105            | 94                                                    |
| GSE62254            | 300                                                   |

**Supplemental Table S3: High mean mRNA expression of JAM-A, b-catenin, FOXA1 and HER2 correlates with poorer overall survival in HER2-positive but not HER2-negative breast cancer patients.**

Mean combined mRNA expression of the JAM-A (F11R),  $\beta$ -catenin (CTNNB1), FOXA1 (HNF3a) and HER2 (ERBB2) genes in breast cancer patients was correlated with overall survival (OS) using the online resource [kmplot.com](https://kmplot.com/); accessed on 10 February 2022), using only JetSet probes. High versus low gene expression categories were based on a split by upper quartile expression levels; and patient survival time was also split by upper quartile levels. There was a significant positive correlation between high mean expression of all four genes and poorer OS in HER2-positive patients (\* $p < 0.05$ ) and all patients (\*\* $p < 0.001$ ), but not in HER2-negative patients ( $p = 0.49$ ).

| Patient category: | Upper quartile patient survival (months): |                                       | <i>p</i> value           |
|-------------------|-------------------------------------------|---------------------------------------|--------------------------|
|                   | High expression<br>( <i>patient</i> #)    | Low expression<br>( <i>patient</i> #) |                          |
| All patients      | 115 ( $n=1,409$ )                         | 59.88 ( $n=470$ )                     | $9 \times 10^{-5}$ (***) |
| HER2-positive     | 66 ( $n=315$ )                            | 42.6 ( $n=105$ )                      | 0.04 (*)                 |
| HER2-negative     | 115 ( $n=1,094$ )                         | 106.8 ( $n=365$ )                     | 0.49                     |
